# Supplementary material for: Determination of Total Sennosides and Sennosides A, B, and A1 in Senna Leaflets, Pods, and Tablets by Two-Dimensional qNMR
Source: MDPI journal article supplement (doi:10.3390/molecules27217349), 2022-10-29
Supplement: s1 [file s1]

## Supporting information

# Determination of Total Sennosides and Sennosides A, B, and A<sub>1</sub> in Senna Leaflets, Pods, and Tablets by Two-dimensional qNMR

Serhat Sezai Çiçek <sup>1,\*</sup>, Calisto Moreno Cardenas <sup>1</sup>, and Ulrich Girreser <sup>2</sup>

<sup>1</sup> Pharmazeutisches Institut, Abteilung Pharmazeutische Biologie, Christian-Albrechts-Universität zu Kiel, Gutenbergstraße 76, 24118 Kiel, Germany

<sup>2</sup> Pharmazeutisches Institut, Abteilung Pharmazeutische und Medizinische Chemie, Christian-Albrechts-Universität zu Kiel, Gutenbergstraße 76, 24118 Kiel, Germany

Correspondence: scicek@pharmazie.uni-kiel.de

The supporting information contains HSQC diagrams of sennosides A, B, and A<sub>1</sub> (Figures S1–S3), diagrams of HSQC experiments without decoupling of aloin (Figure S4) and senna pod solid phase extract (Figure S5), HSQC overlay of sennosides A, B, and A<sub>1</sub> (Figures S6–S7), chromatograms of senna pod extracts before (Figure S8) and after solid phase extraction (Figure S9) and an HSQC overlay of sennosides A, B, A<sub>1</sub>, and aloin (Figure S10).

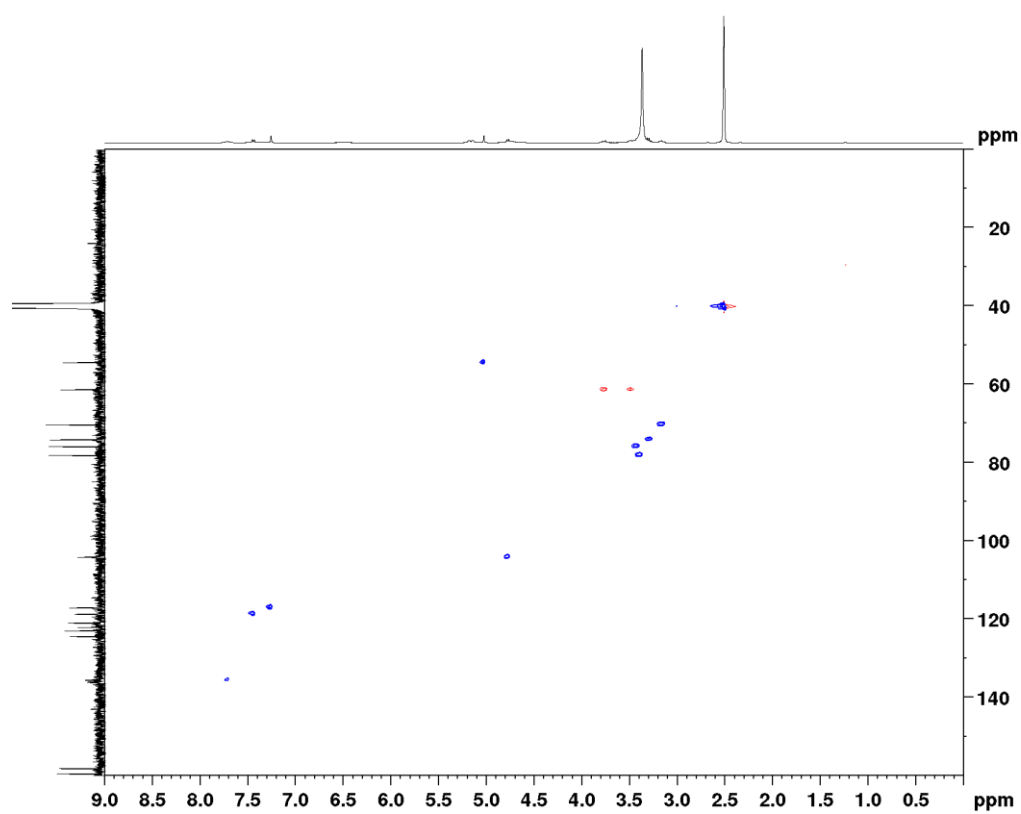

Figure S1: HSQC diagram of sennoside A.

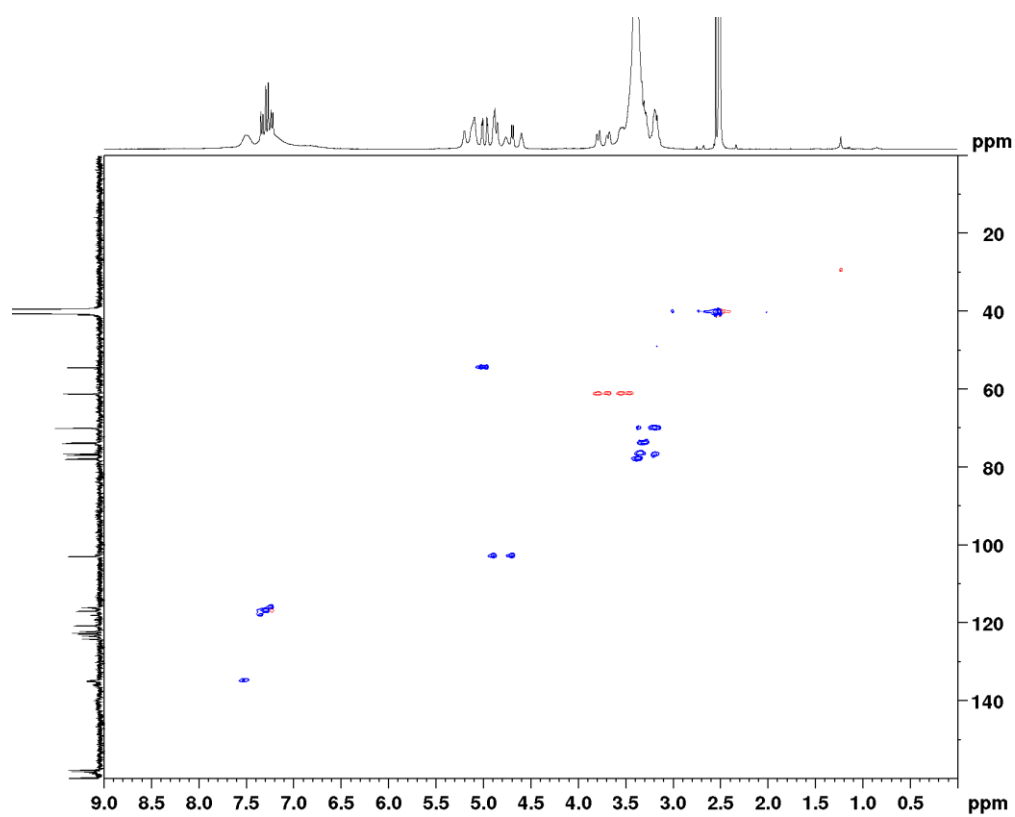

Figure S2: HSQC diagram of sennoside B.

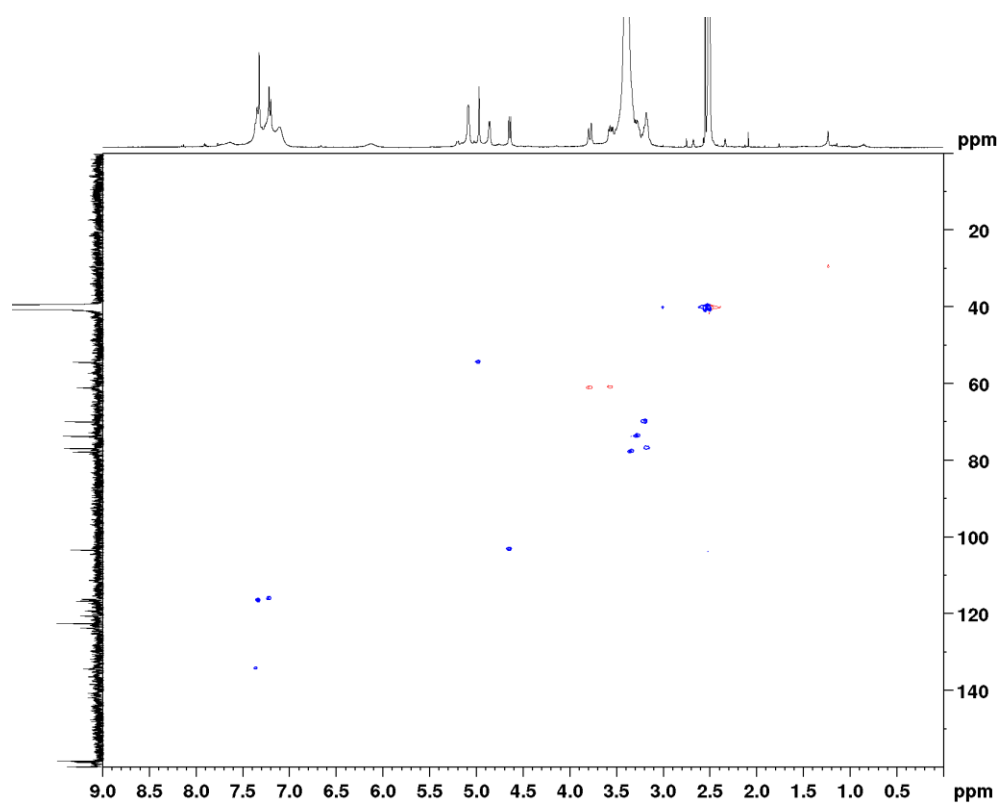

Figure S3: HSQC diagram of sennoside A<sub>1</sub>.

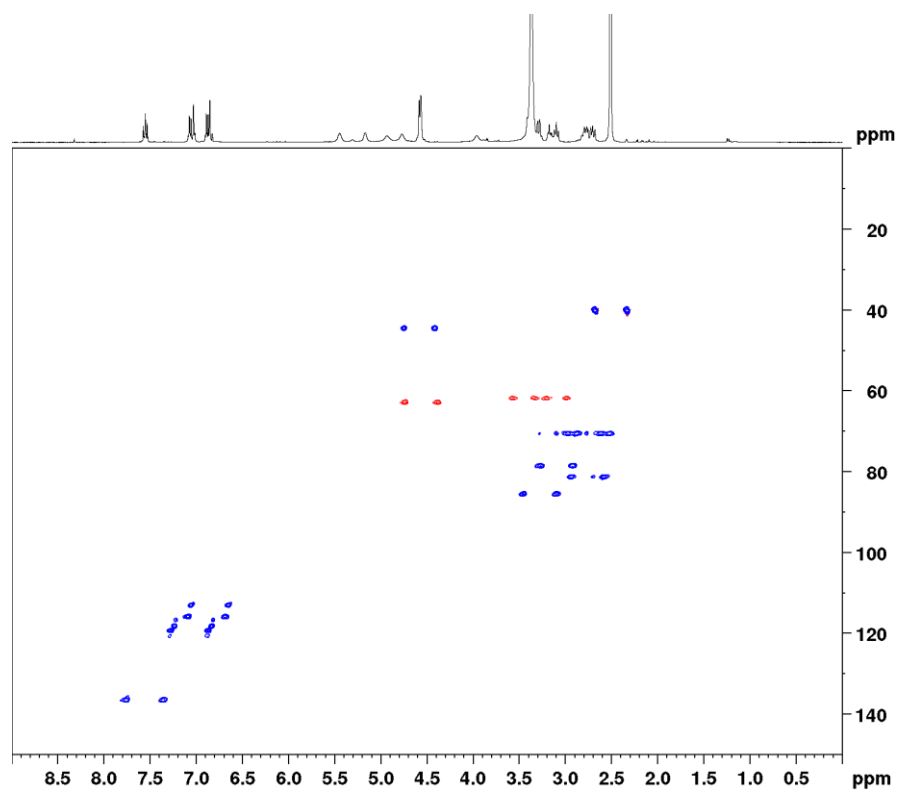

Figure S4: Diagram of an HSQC experiment without decoupling of aloin.

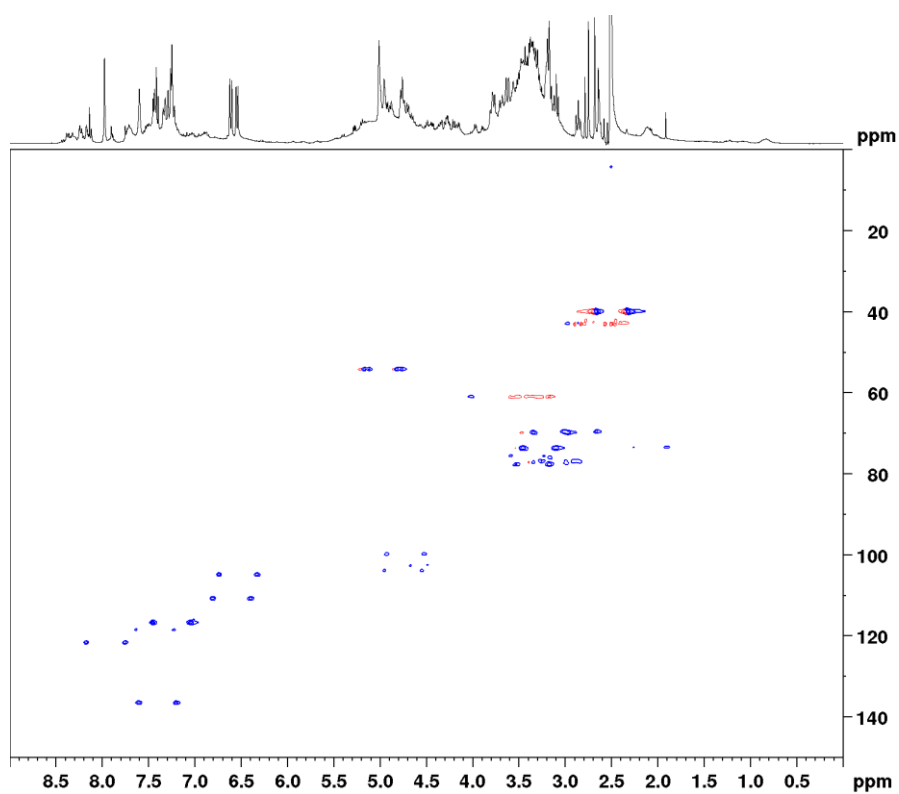

Figure S5: Diagram of an HSQC experiment without decoupling of sennosides.

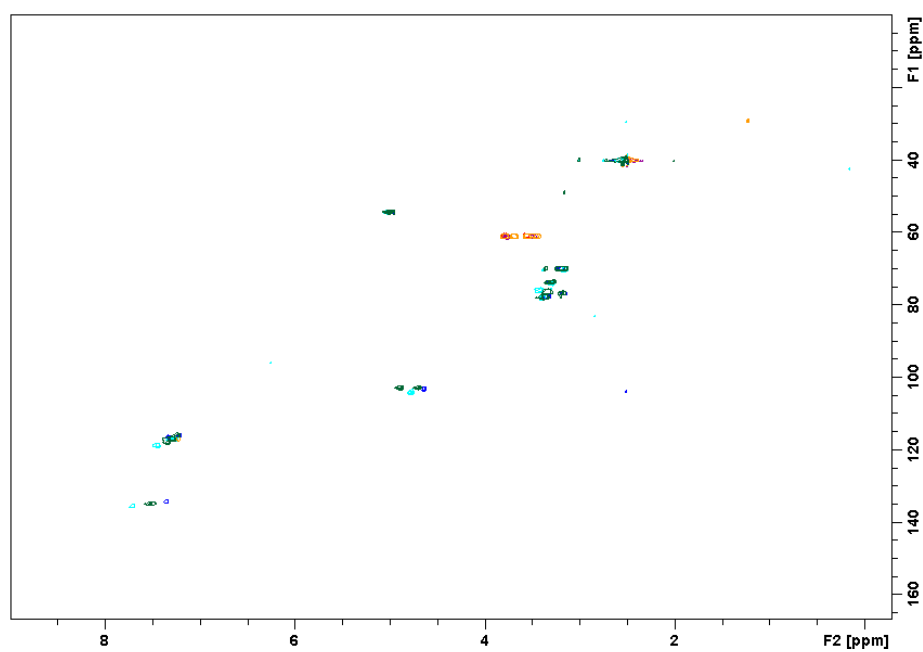

Figure S6: Overlay of HSQC diagrams of sennosides A, B, and A1.

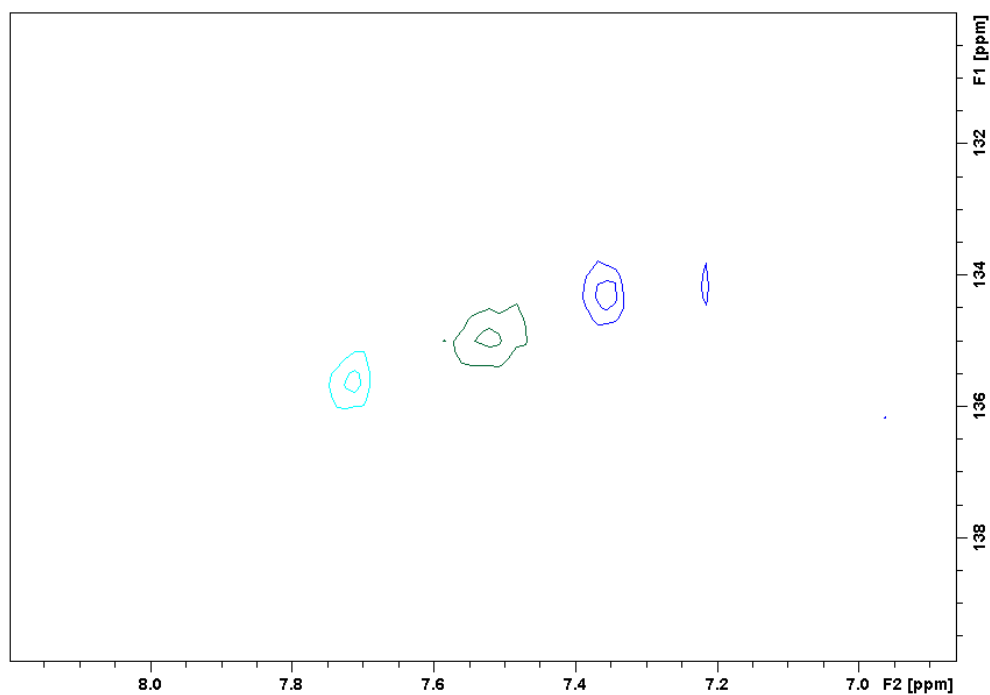

Figure S7: Overlay of HSQC diagrams of sennosides A, B, and A<sub>1</sub> in the region from 6.85 to 8.20 ppm (<sup>1</sup>H) and 130 to 140 ppm (<sup>13</sup>C).

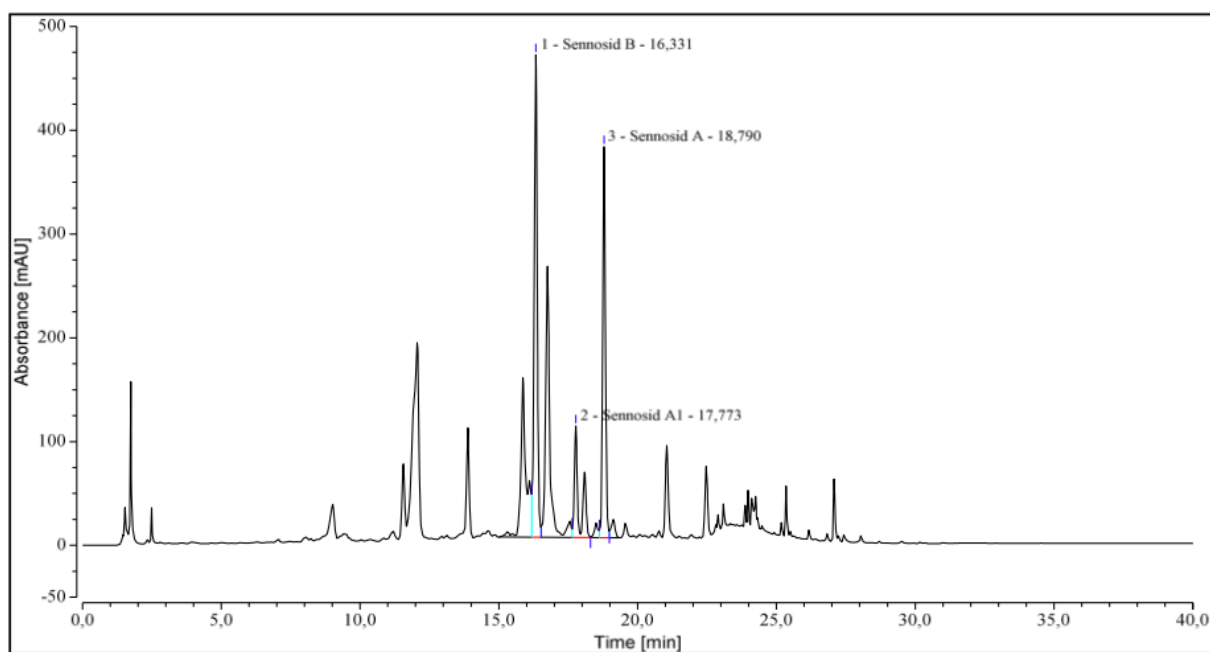

Figure S8: HPLC-UV chromatogram of senna pod extract at 262 nm.

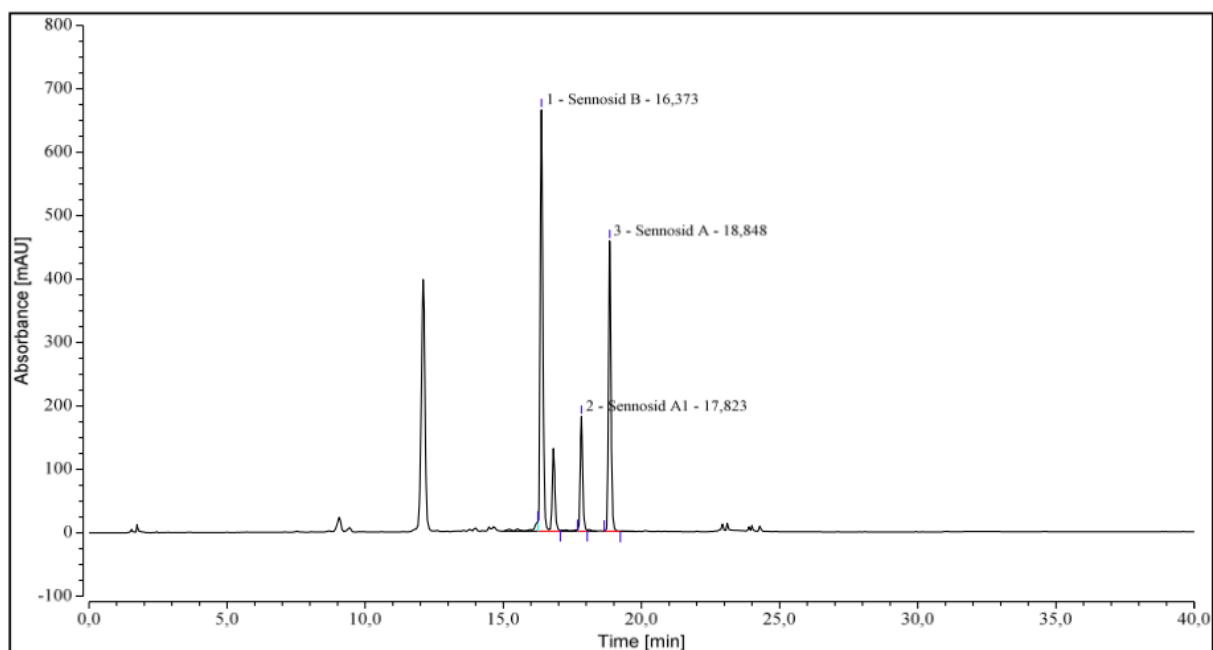

Figure S9: HPLC-UV chromatogram of senna pod solid phase extract at 262 nm.

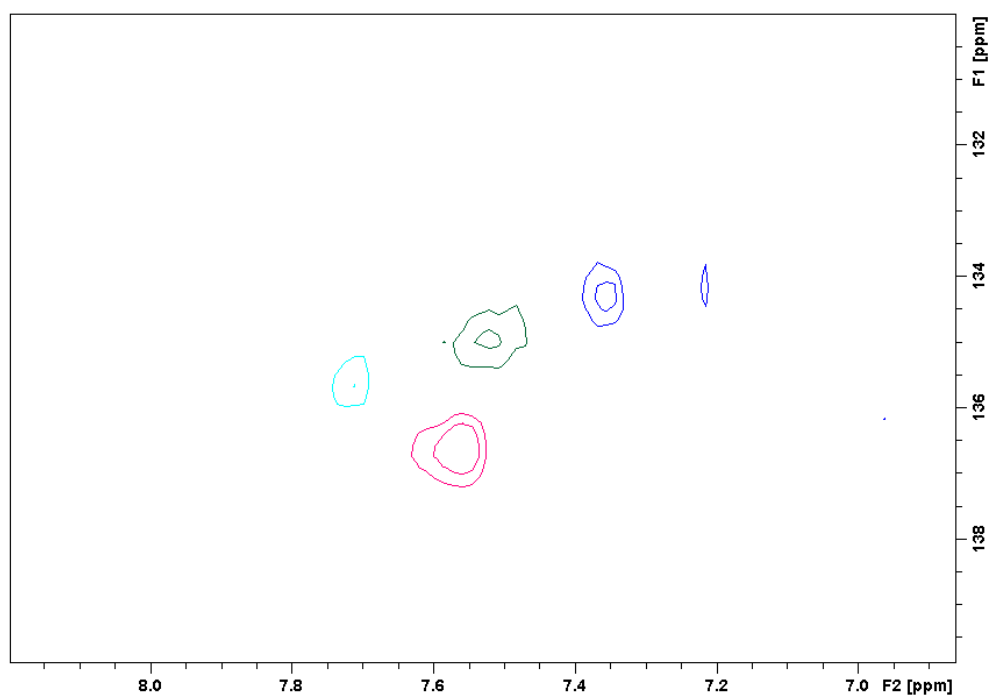

Figure S10: Overlay of HSQC diagrams of sennosides A, B, A<sub>1</sub>, and aloin in the region from 6.85 to 8.20 ppm (<sup>1</sup>H) and 130 to 140 ppm (<sup>13</sup>C).
